# Supplementary material
Source: PubMed Central journal article supplement (PMC6214505)
Supplement: NIHMS80336-supplement-Supplementary_information.pdf [file NIHMS80336-supplement-Supplementary_information.pdf]

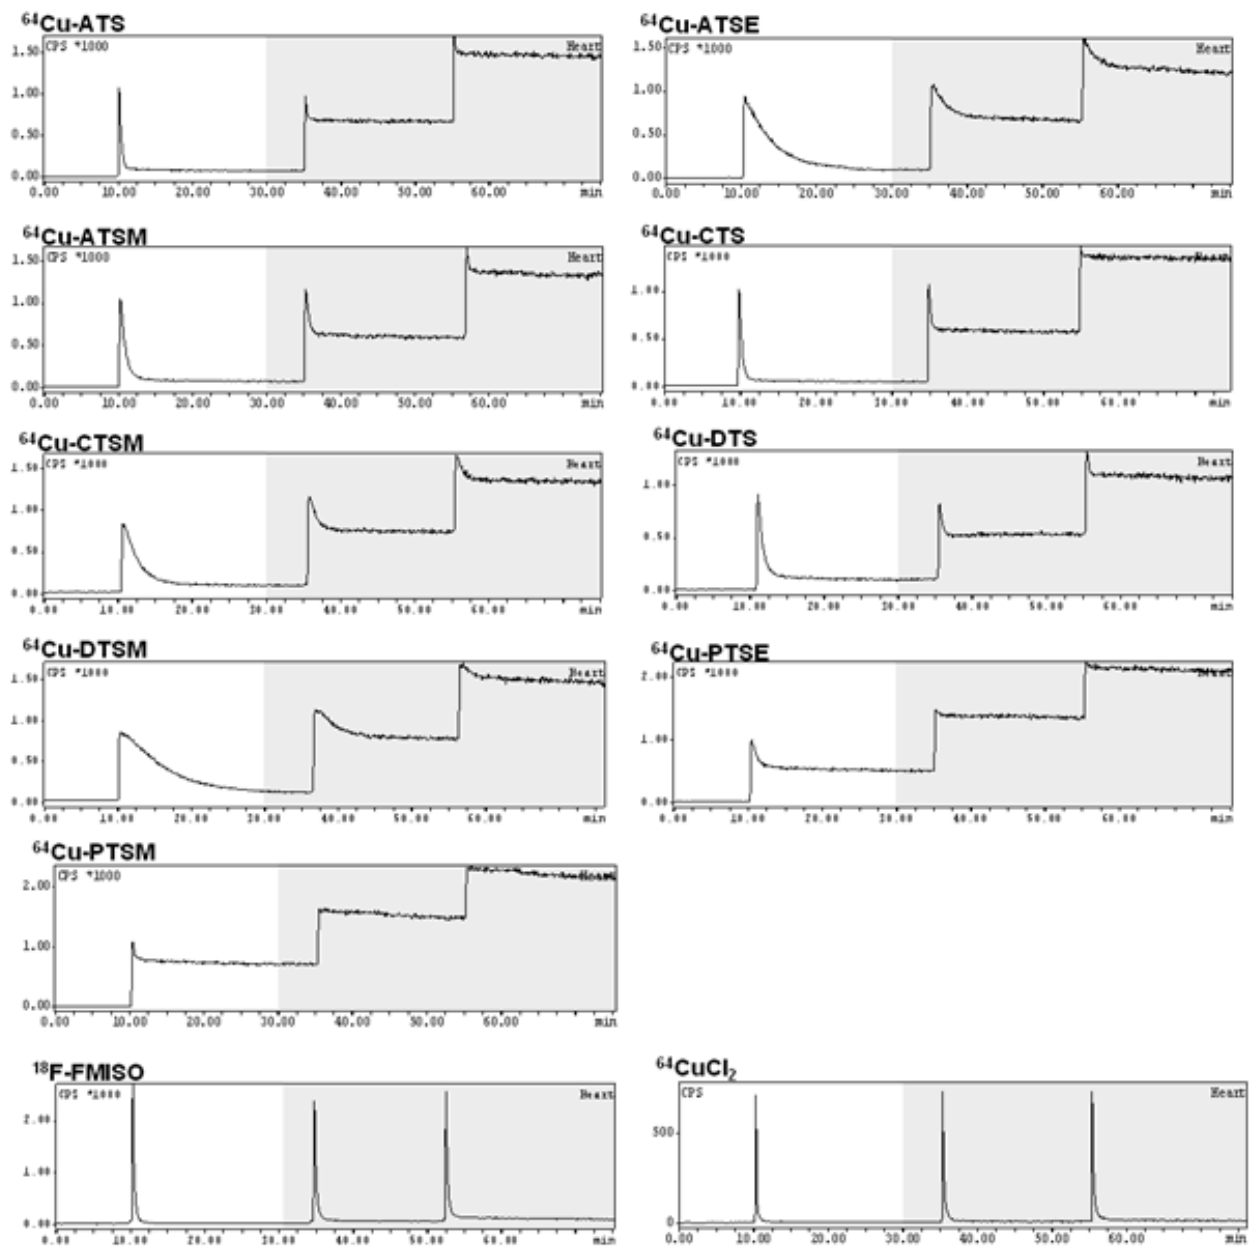

**Supplemental Figure 1.** Representative time-activity curves showing the myocardial clearance/accumulation of all  $^{64}\text{Cu}$ -BTSCs tested,  $^{18}\text{F}$ -fluoromisonidazole (FMISO), and  $^{64}\text{CuCl}_2$  during normoxia (white background) and then hypoxia (gray background). Each spike represents a 1-MBq bolus.
